# Supplementary material for: MG132‐induced progerin clearance is mediated by autophagy activation and splicing regulation
Source: PubMed Central journal article supplement (PMC5582415; doi:10.15252/emmm.201607315), 2017-07-03
Supplement: EMMM-9-1294-s001.pdf [file EMMM-9-1294-s001.pdf]

# **MG132-induced progerin clearance is mediated by autophagy activation and splicing regulation**

Karim Harhour<sup>1</sup>, Claire Navarro<sup>1</sup>, Danielle Depetris<sup>1</sup>, Marie-Geneviève Mattei<sup>1</sup>, Xavier Nissan<sup>2</sup>,  
Pierre Cau<sup>1,3</sup>, Annachiara De Sandre-Giovannoli<sup>1,4</sup>, Nicolas Lévy<sup>1,4,\*</sup>

## **Appendix**

Appendix Figure S1

Appendix Table S1

## Appendix Figure S1

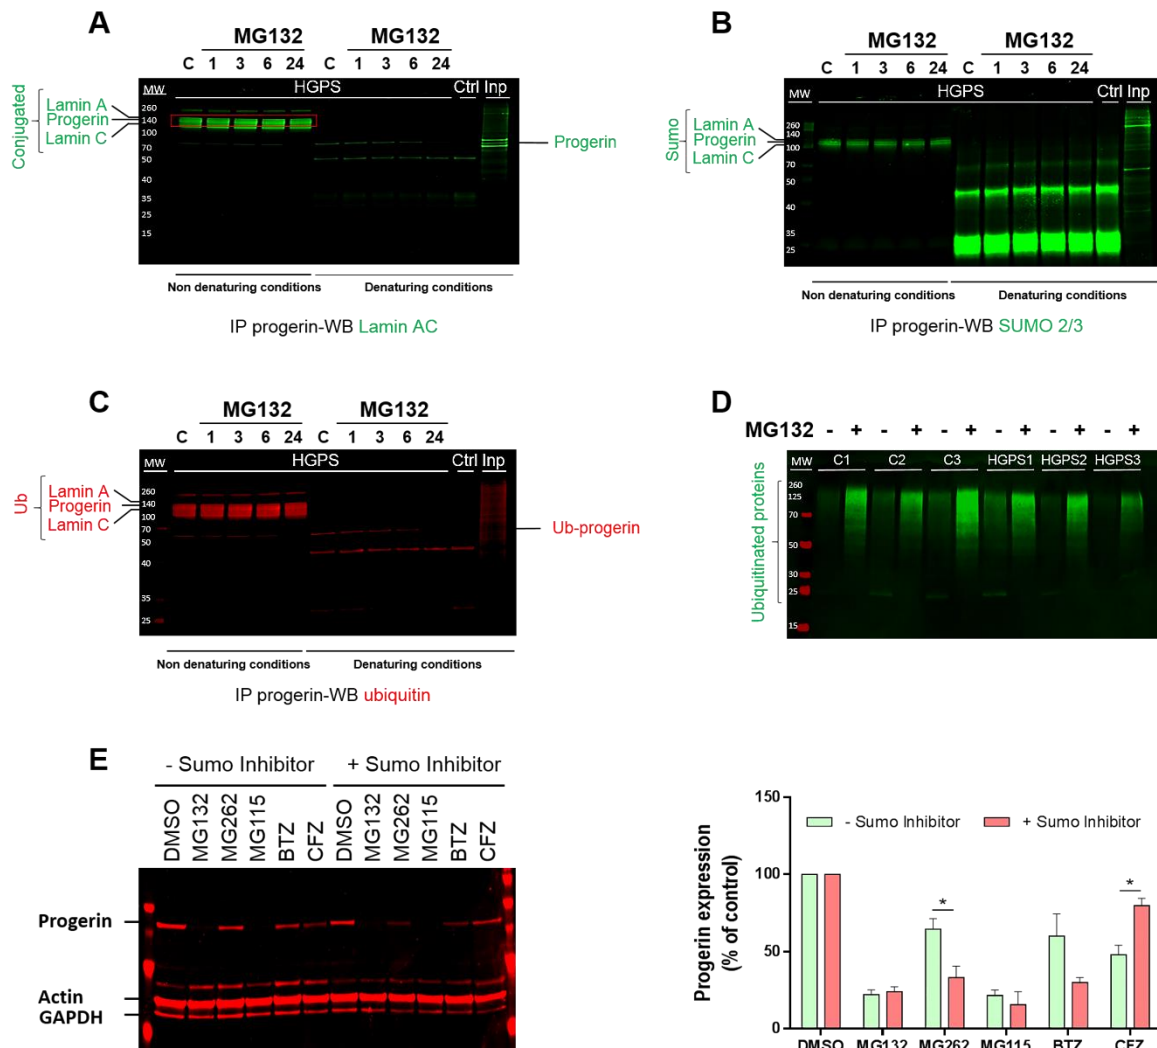

### Appendix Figure S1 - Progerin sumoylation and ubiquitination.

A-C Non-denaturing and denaturing immunoprecipitation (IP) of progerin in HGPS fibroblasts treated for 1, 3, 6 and 24h with 5  $\mu$ M MG132 or with vehicle control (DMSO) “C” for 24h. The same IP was performed on primary fibroblasts from healthy control individual (Ctrl). inp: input is shown in right panel.

**A** Treated HGPS fibroblasts were collected and then subjected to IP with anti-progerin antibody followed by western blot analysis with anti-lamin A/C antibody showing conjugated and non-conjugated lamin A/C.

**B** Sumoylated progerin is not susceptible to MG132 treatment. IP with anti-progerin antibody followed by western blot analysis with anti-SUMO 2/3 antibody showing sumoylated lamin A/C.

**C** Ubiquitinated Progerin is susceptible to MG132 treatment. IP with anti-progerin antibody followed by western blot analysis with anti-ubiquitin antibody.

**D** Primary dermal fibroblasts from healthy control individuals (C1, C2 and C3) and HGPS (HGPS1, HGPS2 and HGPS3) were treated with 5  $\mu$ M MG132 (+) or DMSO (-) for 24 h before lysis. Ubiquitinated proteins were analyzed by immunoblotting with an anti-ubiquitin antibody.

**E** Left panels: Progerin, actin and GAPDH expressions in whole lysates from HGPS fibroblasts treated with or without an inhibitor of protein sumoylation (100  $\mu$ M of either Ginkgolic acid or 2-D08 giving the same result). 24h later cells were treated for 48h with DMSO control or with 5  $\mu$ M MG132, MG262, MG115, bortezomib (BTZ) or carfilzomib (CFZ). Right panels: Progerin expression levels relative to DMSO-treated cells were normalized to actin values using ImageJ software. (n=6).

Data information: All experiments were performed in triplicate. Results in E are expressed as mean  $\pm$  SEM, Student's t-test, \*\*p < .01); the exact P-values are indicated in Appendix Table S1.

## Appendix Table S1

| Figure          | Samples                                             | p-Value |
|-----------------|-----------------------------------------------------|---------|
| <b>Figure 1</b> |                                                     |         |
| 1C              | MG132 3h                                            | 0,4067  |
|                 | MG132 6h                                            | 0,0273  |
|                 | MG132 24h                                           | 0,0034  |
|                 | MG132 48h                                           | 0,0007  |
| 1D              | <b>Progerin</b>                                     |         |
|                 | MG132 36h                                           | 0,0187  |
|                 | MG132 48h                                           | 0,0003  |
|                 | MG132+ Chloroquine 1 $\mu$ M                        | 0,0008  |
|                 | MG132+ Chloroquine 10 $\mu$ M                       | 0,0044  |
|                 | MG132+ Chloroquine 25 $\mu$ M                       | 0,0011  |
| 1D              | <b>LC3BII/LC3BI</b>                                 |         |
|                 | MG132 36h                                           | 0,0125  |
|                 | MG132 48h                                           | 0,0004  |
|                 | MG132+ Chloroquine 1 $\mu$ M                        | 0,0001  |
|                 | MG132+ Chloroquine 10 $\mu$ M                       | 0,0004  |
|                 | MG132+ Chloroquine 25 $\mu$ M                       | 0,0007  |
|                 | MG132+ Chloroquine 50 $\mu$ M                       | 0,0009  |
|                 | Progerin 48h MG132 vs MG132+ Chloroquine 1 $\mu$ M  | 0,8966  |
|                 | Progerin 48h MG132 vs MG132+ Chloroquine 10 $\mu$ M | 0,4709  |
|                 | Progerin 48h MG132 vs MG132+ Chloroquine 25 $\mu$ M | 0,0053  |
|                 | Progerin 48h MG132 vs MG132+ Chloroquine 50 $\mu$ M | 0,0098  |
| <b>Figure 4</b> |                                                     |         |
| 4A              | Well N° 2                                           | 0,0001  |
|                 | Well N°3                                            | 0,097   |
|                 | Well N°4                                            | 0,0294  |
|                 | Well N°5                                            | 0,0169  |
|                 | Well N°6                                            | 0,0028  |
|                 | Well N°7                                            | 0,4476  |
|                 | Well N°8                                            | 0,005   |
|                 | Well N°9                                            | 0,0233  |
|                 | Well N°10                                           | 0,519   |
|                 | Well N°11                                           | 0,0008  |

|    |                     |        |
|----|---------------------|--------|
|    | Well N°12           | 0,0233 |
| 4B | MG132 6h            | 0,0048 |
|    | MG132 24h           | 0,0016 |
|    | MG132 48h           | 0,0014 |
|    | MG132 72h           | 0,0032 |
|    | MG132 96h           | 0,0424 |
| 4C | <b>Progerin</b>     |        |
|    | MG132 6h            | 0,0124 |
|    | MG132 24h           | 0,041  |
|    | MG132 48h           | 0,0026 |
|    | MG132 72h           | 0,0557 |
|    | MG132 96h           | 0,0532 |
| 4C | <b>SRSF-1</b>       |        |
|    | MG132 6h            | 0,4057 |
|    | MG132 24h           | 0,0025 |
|    | MG132 48h           | 0,0118 |
|    | MG132 72h           | 0,0511 |
|    | MG132 96h           | 0,1502 |
| 4D | <b>Trypsin</b>      |        |
|    | MG132 6h            | 0,4228 |
|    | MG132 24h           | 0,0406 |
|    | MG132 48h           | 0,0006 |
|    | MG132 72h           | 0,8002 |
|    | MG132 96h           | 0,8443 |
| 4D | <b>Chymotrypsin</b> |        |
|    | MG132 6h            | 0,007  |
|    | MG132 24h           | 0,0016 |
|    | MG132 48h           | 0,0009 |
|    | MG132 72h           | 0,1167 |
|    | MG132 96h           | 0,3921 |
| 4D | <b>Caspase-like</b> |        |
|    | MG132 6h            | 0,023  |
|    | MG132 24h           | 0,0083 |
|    | MG132 48h           | 0,0008 |
|    | MG132 72h           | 0,3266 |
|    | MG132 96h           | 0,7869 |
| 4E | <b>Progerin</b>     |        |
|    | MG132 2h            | 0,0545 |
|    | MG132 4h            | 0,0593 |

|    |                                                  |        |
|----|--------------------------------------------------|--------|
|    | MG132 6h                                         | 0,0103 |
|    | MG132 12h                                        | 0,009  |
|    | MG132 24h                                        | 0,002  |
|    | MG132 48h                                        | 0,0009 |
|    | MG132 72h                                        | 0,0007 |
|    | MG132 96h                                        | 0,0003 |
| 4E | <b>SRSF-5</b>                                    |        |
|    | MG132 2h                                         | 0,6041 |
|    | MG132 4h                                         | 0,0003 |
|    | MG132 6h                                         | 0,0004 |
|    | MG132 12h                                        | 0,0001 |
|    | MG132 24h                                        | 0,4466 |
|    | MG132 48h                                        | 0,5127 |
|    | MG132 72h                                        | 0,855  |
|    | MG132 96h                                        | 0,317  |
| 4E | <b>SRSF-1</b>                                    |        |
|    | MG132 2h                                         | 0,4818 |
|    | MG132 4h                                         | 0,5229 |
|    | MG132 6h                                         | 0,4188 |
|    | MG132 12h                                        | 0,6993 |
|    | MG132 24h                                        | 0,002  |
|    | MG132 48h                                        | 0,008  |
|    | MG132 72h                                        | 0,0002 |
|    | MG132 96h                                        | 0,0006 |
| 4E | <b>LC3BII/LC3BI</b>                              |        |
|    | MG132 2h                                         | 0,0004 |
|    | MG132 4h                                         | 0,0001 |
|    | MG132 6h                                         | 0,0002 |
|    | MG132 12h                                        | 0,0004 |
|    | MG132 24h                                        | 0,0002 |
|    | MG132 48h                                        | 0,0005 |
|    | MG132 72h                                        | 0,0004 |
|    | MG132 96h                                        | 0,0007 |
| 4F | <b>Progerin</b>                                  |        |
|    | Control siRNA (-MG132) vs Control siRNA (+MG132) | 0,0015 |
|    | Control siRNA (-MG132) vs SRSF1 siRNA (-MG132)   | 0,0147 |
|    | Control siRNA (+MG132) vs SRSF1 siRNA (+MG132)   | 0,0313 |
| 4G | <b>Progerin</b>                                  |        |
|    | Well N°2                                         | 0,0079 |
|    | Well N°3                                         | 0,051  |
|    | Well N°4                                         | 0,3323 |

|    |                      |        |
|----|----------------------|--------|
|    | Well N°5             | 0,8475 |
|    | Well N°6             | 0,0264 |
|    | Well N°7             | 0,0255 |
|    | Well N°8             | 0,0133 |
|    | Well N°9             | 0,7612 |
|    | Well N°2 vs Well N°6 | 0,0054 |
|    | Well N°2 vs Well N°7 | 0,0055 |
|    | Well N°6 vs Well N°9 | 0,0225 |
| 4G | <b>SRSF-1</b>        |        |
|    | Well N°2             | 0,0357 |
|    | Well N°3             | 0,4263 |
|    | Well N°4             | 0,168  |
|    | Well N°5             | 0,0502 |
|    | Well N°6             | 0,0221 |
|    | Well N°7             | 0,0239 |
|    | Well N°8             | 0,5318 |
|    | Well N°9             | 0,8363 |

### Figure 5

|    |                                |          |
|----|--------------------------------|----------|
| 5B | MG132 vs DMSO                  | 0,0489   |
| 5C | hgps (5y) MG132 vs DMSO        | 0,0154   |
|    | hgps (14y) MG132 vs DMSO       | 0,0337   |
|    | control (14y) MG132 vs DMSO    | 0,1261   |
|    | control (96y) MG132 vs DMSO    | 0,0216   |
|    | HGPS (14y) vs control (14y)    | 0,0022   |
|    | HGPS (14y) vs control (96y)    | 0,0029   |
|    | control (14y) vs control (96y) | 0,002    |
| 5D | <b>Untreated vs day 0</b>      |          |
|    | MG132 1                        | > 0,9999 |
|    | MG132 2                        | 0,0066   |
|    | MG132 4                        | 0,009    |
|    | MG132 6                        | 0,0034   |
|    | MG132 8                        | 0,0007   |
|    | MG132 10                       | 0,0043   |
|    | <b>DMSO vs day 0</b>           |          |
|    | MG132 1                        | 0,2236   |
|    | MG132 2                        | 0,0056   |
|    | MG132 4                        | 0,004    |

|    |                      |        |
|----|----------------------|--------|
|    | MG132 6              | 0,001  |
|    | MG132 8              | 0,0004 |
|    | MG132 10             | 0,0002 |
|    | <b>MG132 vs DMSO</b> |        |
|    | MG132 1              | 0,6253 |
|    | MG132 2              | 0,0236 |
|    | MG132 4              | 0,0132 |
|    | MG132 6              | 0,0137 |
|    | MG132 8              | 0,0112 |
|    | MG132 10             | 0,0128 |
| 5E | <b>MG132 vs DMSO</b> |        |
|    | MG132 1              | 0,1694 |
|    | MG132 2              | 0,0795 |
|    | MG132 4              | 0,0187 |
|    | MG132 6              | 0,009  |
|    | MG132 8              | 0,0016 |
|    | MG132 10             | 0,008  |
| 5F | <b>MG132 vs DMSO</b> |        |
|    | MG132 1              | 0,0638 |
|    | MG132 2              | 0,2502 |
|    | MG132 4              | 0,0529 |
|    | MG132 6              | 0,5027 |
|    | MG132 8              | 0,0115 |
|    | MG132 10             | 0,0481 |
| 5G | <b>MG132 vs DMSO</b> |        |
|    | MG132 1              | 0,0202 |
|    | MG132 2              | 0,1345 |
|    | MG132 4              | 0,273  |
|    | MG132 6              | 0,3526 |
|    | MG132 8              | 0,6349 |
|    | MG132 10             | 0,2665 |

## Figure 7

|    |                      |        |
|----|----------------------|--------|
| 7B | <b>MG132 vs DMSO</b> |        |
|    | Lamin A              | 0,435  |
|    | Progerin             | 0,0433 |
|    | Lamin C              | 0,2401 |
|    | SRSF-1               | 0,0153 |
|    | <b>MG132 vs DMSO</b> |        |



|    |          |        |
|----|----------|--------|
| 7C | Lamin A  | 0,2399 |
|    | Progerin | 0,0039 |
|    | Lamin C  | 0,0112 |
|    | SRSF-1   | 0,0143 |

**Figure EV1**

|      |                                          |        |
|------|------------------------------------------|--------|
| EV1B | <b>Normal PML-NBs: HGPS vs control</b>   |        |
|      | Passage 9                                | 0,3462 |
|      | Passage 10                               | 0,3266 |
|      | Passage 11                               | 0,4939 |
|      | Passage 12                               | 0,4648 |
|      | Passage 13                               | 0,075  |
|      | Passage 14                               | 0,0088 |
|      | Passage 15                               | 0,0864 |
|      | Passage 16                               | 0,0942 |
|      | Passage 17                               | 0,0155 |
|      | Passage 18                               | 0,0112 |
|      | Passage 19                               | 0,0112 |
|      | Passage 20                               | 0,0047 |
|      | Passage 21                               | 0,0119 |
|      | Passage 22                               | 0,0289 |
|      | Passage 24                               | 0,0043 |
|      | Passage 25                               | 0,0013 |
|      | Passage 26                               | 0,0009 |
|      | <b>Abnormal PML-NBs: HGPS vs control</b> |        |
|      | Passage 9                                | 0,3462 |
|      | Passage 10                               | 0,3266 |
|      | Passage 11                               | 0,4939 |
|      | Passage 12                               | 0,4648 |
|      | Passage 13                               | 0,075  |
|      | Passage 14                               | 0,042  |
|      | Passage 15                               | 0,1124 |
|      | Passage 16                               | 0,0942 |
|      | Passage 17                               | 0,0155 |
|      | Passage 18                               | 0,0143 |
|      | Passage 19                               | 0,0255 |
|      | Passage 20                               | 0,0047 |
|      | Passage 21                               | 0,0119 |
|      | Passage 22                               | 0,0211 |
|      | Passage 24                               | 0,002  |
|      | Passage 25                               | 0,004  |
|      | Passage 26                               | 0,0008 |

### Figure EV3

|      |                            |        |
|------|----------------------------|--------|
| EV3C | <b>MG132 vs DMSO</b>       |        |
|      | MG132                      | 0,0008 |
|      | MG115                      | 0,0011 |
|      | MG262                      | 0,0008 |
|      | BTZ                        | 0,0035 |
|      | CFZ                        | 0,002  |
| EV3D | <b>MG132 vs DMSO</b>       |        |
|      | Chymotrypsin               | 0,0001 |
|      | Trypsin                    | 0,0002 |
|      | Caspase-like               | 0,0001 |
|      | <b>Bortezomib vs DMSO</b>  |        |
|      | Chymotrypsin               | 0,0001 |
|      | Trypsin                    | 0,0001 |
|      | Caspase-like               | 0,0002 |
|      | <b>Carfilzomib vs DMSO</b> |        |
|      | Chymotrypsin               | 0,0001 |
|      | Trypsin                    | 0,004  |
|      | Caspase-like               | 0,0001 |

### Figure EV4

|      |                               |        |
|------|-------------------------------|--------|
| EV4A | <b>Lamin A: MG132 vs DMSO</b> |        |
|      | MG132 1h                      | 0,0364 |
|      | MG132 3h                      | 0,0804 |
|      | MG132 6h                      | 0,0194 |
|      | MG132 24h                     | 0,0046 |
|      | MG132 48h                     | 0,0014 |
|      | <b>Lamin C: MG132 vs DMSO</b> |        |
|      | MG132 1h                      | 0,4152 |
|      | MG132 3h                      | 0,458  |
|      | MG132 6h                      | 0,007  |
|      | MG132 24h                     | 0,0009 |
|      | MG132 48h                     | 0,0023 |
| EV4B | <b>Lamin A: MG132 vs DMSO</b> |        |
|      | MG132 6h                      | 0,016  |
|      | MG132 24h                     | 0,0241 |
|      | MG132 36h                     | 0,0026 |

|           |        |
|-----------|--------|
| MG132 48h | 0,0438 |
|-----------|--------|

**Lamin C: MG132 vs DMSO**

|          |        |
|----------|--------|
| MG132 6h | 0,0392 |
|----------|--------|

|           |       |
|-----------|-------|
| MG132 24h | 0,001 |
|-----------|-------|

|           |        |
|-----------|--------|
| MG132 36h | 0,0218 |
|-----------|--------|

|           |        |
|-----------|--------|
| MG132 48h | 0,0439 |
|-----------|--------|

**Appendix Figure S1E +Sumo Inhibitor vs -Sumo Inhibitor**

|       |        |
|-------|--------|
| MG132 | 0,6888 |
|-------|--------|

|       |        |
|-------|--------|
| MG262 | 0,0351 |
|-------|--------|

|       |        |
|-------|--------|
| MG115 | 0,5407 |
|-------|--------|

|     |        |
|-----|--------|
| BTZ | 0,1099 |
|-----|--------|

|     |        |
|-----|--------|
| CFZ | 0,0145 |
|-----|--------|
